## Correction

# Correction: Why Some Plant Species Are Rare

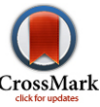

### The *PLOS ONE* Staff

The first author's name is incorrect. The correct name is: G. W. Wiegner Wamelink.

The third author's name is incorrect. The correct name is: Joep Y. Frissel.

The correct citation is: Wamelink GWW, Goedhart PW, Frissel JY (2014) Why Some Plant Species Are Rare. *PLoS ONE* 9(7): e102674. doi:10.1371/journal.pone.0102674

### Reference

1. Wamelink GWW, Goedhart PW, Frissel JY (2014) Why Some Plant Species Are Rare. *PLoS ONE* 9(7): e102674. doi:10.1371/journal.pone.0102674

**Citation:** The *PLOS ONE* Staff (2014) Correction: Why Some Plant Species Are Rare. *PLoS ONE* 9(10): e111293. doi:10.1371/journal.pone.0111293

**Published:** October 14, 2014

**Copyright:** © 2014 The *PLOS ONE* Staff. This is an open-access article distributed under the terms of the Creative Commons Attribution License, which permits unrestricted use, distribution, and reproduction in any medium, provided the original author and source are credited.
